# Supplementary material for: Refining the reaction mechanism of O2 towards its co-substrate in cofactor-free dioxygenases
Source: PeerJ. 2016 Dec 20;4:e2805. doi: 10.7717/peerj.2805 (PMC5178339; doi:10.7717/peerj.2805)
Supplement: Supplemental Information 2 — Electronic energies of intermediates in the 1-H-3-hydroxy-4-oxoquinaldine-2,4-dioxygenase reaction mechanism. [file peerj-04-2805-s002.xlsx]

## Sheet: Raw data (in chlorobenzene)
								Full model		Substrate only		Substrate_Asp_His		newly optimized substrate_Asp_His
								singlet	triplet	singlet	triplet	singlet	triplet	singlet	triplet
					HODF	3R	1	-2.24746e+06	-2247475	-502882	-502900	-811894	-811914	-811970	-811995
					HODF	MECP								-811985	-811986
					HODF	3I1	2	-2.24746e+06	-2.24747e+06	-502895	-502898	-811901	-811910
					HODF	1i1	3	-2.24748e+06	-2.24743e+06	-502916	-502860	-811924	-811868	-811998	-811966
					HODF	1TS3	4	-2.24746e+06		-502893		-811900
					HODMe	3R	1	-2.20986e+06	-2.20988e+06	-465288	-465306	-774301	-774320	-774380	-774403
					HODMe	MECP								-774388	-774388
					HODMe	3I1	2	-2.20986e+06	-2.20987e+06	-465296	-465295	-774303	-774308
					HODMe	1i1	3	-2.20988e+06	-2.20983e+06	-465310	-465258	-774318	-774271	-774394	-774374
					HODMe	1TS3	4	-2.20987e+06		-465299		-774310
					HODnBu	3R	1	-2.30851e+06	-2.30854e+06	-563943	-563969	-872956	-872983	-873061	-873086
					HODnBu	MECP								-873069	-873069
					HODnBu	3I1	2	-2.30852e+06	-2.30852e+06	-563959	-563953	-872965	-872964
					HODnBu	1i1	3	-2.30853e+06	-2.30849e+06	-563972	-563924	-872980	-872933	-873075	-873056
					HODnBu	1TS3	4	-2.30851e+06		-563961		-872964
					HODNO2	3R	1	-2.3135e+06	-2.31353e+06	-568941	-568972	-877949	-877981	-878031	-878065
					HODNO2	MECP								-878041	-878041
					HODNO2	3I1	2	-2.3135e+06	-2.31351e+06	-568950	-568948	-877954	-877957
					HODNO2	1I1 charge transfer								-878042	-878047
					HODNO2	1i1	3	-2.31352e+06	-2.31347e+06	-568962	-568904	-877969	-877917	-878050	-878026
					HODNO2	1TS3	4	-2.31351e+06		-568946		-877953
								Full model	Full model	Substrate only	Substrate only	Substrate_Asp_His	Substrate_Asp_His	newly optimized substrate_Asp_His	newly optimized substrate_Asp_His
			literature values (include deltaG corrections)					singlet	triplet	singlet	triplet	singlet	triplet	singlet	triplet
	HODF	3R	0		HODF	3R	1	19.76	0	18.39	0	20.43	0	24.8	0
	HODF	MECP			HODF	MECP	2							9.5	9.17
	HODF	3I1	11.1		HODF	3I1	1.8	19.36	5.89	4.94	2.23	13.48	4.59
	HODF	1i1	1.1		HODF	1i1	2.2	-8.87	43.08	-15.19	40.38	-9.1	46.04	-3.42	28.61
	HODF	1TS3	18		HODF	1TS3	3	13.3		7.06		14.07
	HODMe	3R	0		HODMe	3R	1	18.45	0	17.48	0	19.33	0	22.84	0
	HODMe	MECP			HODMe	MECP	2							15.19	15.26
	HODMe	3I1	17.4		HODMe	3I1	1.8	21.43	12.78	9.84	10.51	17.71	12.56
	HODMe	1i1	9.3		HODMe	1i1	2.2	2.21	46.85	-4.28	47.05	2.37	49.58	9.03	29.49
	HODMe	1TS3	14.7		HODMe	1TS3	3	8.8		6.6		10.57
	HODnBu	3R	0		HODnBu	3R	1	25.47	0	25.45	0	27.24	0	24.96	0
	HODnBu	MECP			HODnBu	MECP	2							16.82	16.77
	HODnBu	3I1	26.8		HODnBu	3I1	1.8	18.05	19.13	10.03	15.69	18.18	18.93
	HODnBu	1i1	16.6		HODnBu	1i1	2.2	5.45	52.07	-3.43	44.89	3.21	50.74	11.06	30.53
	HODnBu	1TS3	33.6		HODnBu	1TS3	3	26.71		7.78		19.68
	HODNO2	3R	0		HODNO2	3R	1	33.22	0	30.58	0	32.21	0	34.01	0
	HODNO2	MECP			HODNO2	MECP	2							24.17	24.17
	HODNO2	3I1	26.9		HODNO2	3I1	1.8	31.34	20.01	21.8	24.17	26.92	23.55
	HODNO2	1I1 charge transfer			HODNO2	1I1 charge transfer	2.2							23.61	18.93
	HODNO2	1i1	16		HODNO2	1i1	2.5	8.71	59.12	9.98	68.1	11.95	63.93	15.6	39.41
	HODNO2	1TS3	25.2		HODNO2	1TS3	3	19.37		25.38		28.19
								SCF

## Sheet: Raw data (in water)
								Full model		Substrate only		Substrate_Asp_His		newly optimized substrate_Asp_His
								singlet	triplet	singlet	triplet	singlet	triplet	singlet	triplet
					HODF	3R	1	-2.24746e+06	-2.24748e+06	-502894	-502912	-811905	-811924	-811970	-811995
					HODF	MECP								-811985	-811986
					HODF	3I1	2	-2.24746e+06	-2.24748e+06	-502907	-502908	-811912	-811919	-811988
					HODF	1i1	3	-2.24749e+06	-2.24744e+06	-502927	-502870	-811934	-811878	-811998	-811966
					HODF	1TS3	4	-2.24747e+06		-502904		-811911
					HODMe	3R	1	-2.20987e+06	-2.20989e+06	-465301	-465317	-774312	-774330	-774380	-774403
					HODMe	MECP								-774388	-774388
					HODMe	3I1	2	-2.20987e+06	-2.20988e+06	-465308	-465306	-774315	-774317
					HODMe	1i1	3	-2.20989e+06	-2.20984e+06	-465321	-465271	-774329	-774281	-774394	-774374
					HODMe	1TS3	4	-2.20988e+06		-465310		-774321
					HODnBu	3R	1	-2.30852e+06	-2.30854e+06	-563953	-563978	-872965	-872992	-873061	-873086
					HODnBu	MECP								-873069	-873069
					HODnBu	3I1	2	-2.30853e+06	-2.30852e+06	-563968	-563963	-872975	-872973
					HODnBu	1i1	3	-2.30854e+06	-2.30849e+06	-563983	-563934	-872990	-872941	-873075	-873056
					HODnBu	1TS3	4	-2.30852e+06		-563971		-872974
					HODNO2	3R	1	-2.31351e+06	-2.31354e+06	-568951	-568981	-877958	-877990	-878031	-878065
					HODNO2	MECP								-878041	-878041
					HODNO2	3I1	2	-2.31351e+06	-2.31352e+06	-568960	-568957	-877965	-877966	-878040
					HODNO2	1I1 charge transfer								-878042	-878047
					HODNO2	1i1	3	-2.31353e+06	-2.31348e+06	-568972	-568912	-877979	-877929
					HODNO2	1TS3	4	-2.31352e+06		-568956		-877962
								Full model	Full model	Substrate only	Substrate only	Substrate_Asp_His	Substrate_Asp_His	newly optimized substrate_Asp_His	newly optimized substrate_Asp_His
								singlet	triplet	singlet	triplet	singlet	triplet	singlet	triplet
					HODF	3R	1	19.47	0	17.8	0	19.52	0	24.8	0
					HODF	MECP	2							9.5	9.17
					HODF	3I1	1.8	17.93	5.54	5.02	3.47	11.72	5.31	6.93
					HODF	1i1	2.2	-10.06	42.39	-14.99	41.54	-10.07	45.9	-3.42	28.61
					HODF	1TS3	3	12.66		7.92		13.42
					HODMe	3R	1	18.11	0	16.72	0	18.27	0	22.84	0
					HODMe	MECP	2							15.19	15.26
					HODMe	3I1	1.8	20.24	12.59	9.63	11.64	15.68	13.53
					HODMe	1i1	2.2	0.58	45.66	-4.11	46.65	1.21	48.84	9.03	29.49
					HODMe	1TS3	3	7.85		6.8		9.72
					HODnBu	3R	1	24.94	0	25.27	0	26.84	0	24.96	0
					HODnBu	MECP	2							16.82	16.77
					HODnBu	3I1	1.8	17.01	19.24	10.02	15.7	16.51	18.69
					HODnBu	1i1	2.2	4.81	51.65	-4.37	44.88	1.52	50.16	11.06	30.53
					HODnBu	1TS3	3	25.54		7.11		17.22
					HODNO2	3R	1	33.16	0	30.62	0	31.84	0	34.01	0
					HODNO2	MECP	2							24.17	24.17
					HODNO2	3I1	1.8	29.2	19.01	21.41	24.83	25.03	24.04	25.38
					HODNO2	1I1 charge transfer	2.2							23.61	18.93
					HODNO2	1i1	2.5	7.17	57.85	9.16	68.97	10.56	61.08
					HODNO2	1TS3	3	19.02		25.52		27.38

## Sheet: HODF
				singlet	singlet	singlet
				Full model (Singlet)	Substrate only (Singlet)	Substrate_Asp_His (Singlet)
1	HODF	3R	1	19.47	17.8	19.52		-0.05
2			1.3	19.47	17.8	19.52		-0.05
3	HODF	3I1	1.8	17.93	5.02	11.72		6.21
4			2.1	17.93	5.02	11.72		6.21
5	HODF	1i1	2.2	-10.06	-14.99	-10.07		0.01
6			2.5	-10.06	-14.99	-10.07		0.01
7	HODF	1TS3	3	12.66	7.92	13.42		-0.76
8			3.3	12.66	7.92	13.42		-0.76
				Full model (Triplet)	Substrate only (Triplet)	Substrate_Asp_His (Triplet)
75	HODF	3R	1	0	0	0		0
76			1.3	0	0	0		0
77	HODF	3I1	1.8	5.54	3.47	5.31		0.23
78			2.1	5.54	3.47	5.31		0.23
79	HODF	1i1	2.2	42.39	41.54	45.9		-3.51
80			2.5	42.39	41.54	45.9		-3.51
				newly optimized substrate_Asp_His (Singlet)	newly optimized substrate_Asp_His (Triplet)
41	HODF	3R	1	24.8	0
42			1.3	24.8	0
43	HODF	MECP	1.85	9.5	9.17
44			2.15	9.5	9.17
45	HODF	1i1	2.2	-3.42	28.61
46			2.5	-3.42	28.61

## Sheet: HODMe
				singlet	singlet	singlet
				Full model (Singlet)	Substrate only (Singlet)	Substrate_Asp_His (Singlet)
1	HODMe	3R	1	18.11	16.72	18.27		-0.16
2			1.3	18.11	16.72	18.27		-0.16
3	HODMe	3I1	1.8	20.24	9.63	15.68		4.56
4			2.1	20.24	9.63	15.68		4.56
5	HODMe	1i1	2.2	0.58	-4.11	1.21		-0.63
6			2.5	0.58	-4.11	1.21		-0.63
7	HODMe	1TS3	3	7.85	6.8	9.72
8			3.3	7.85	6.8	9.72
				Full model (Triplet)	Substrate only (Triplet)	Substrate_Asp_His (Triplet)
75	HODMe	3R	1	0	0	0
76			1.3	0	0	0		0
77	HODMe	3I1	1.8	12.59	11.64	13.53		-0.94
78			2.1	12.59	11.64	13.53		-0.94
79	HODMe	1i1	2.2	45.66	46.65	48.84		-3.18
80			2.5	45.66	46.65	48.84		-3.18
				newly optimized substrate_Asp_His (Singlet)	newly optimized substrate_Asp_His (Triplet)
41	HODMe	3R	1	22.84	0
42			1.3	22.84	0
43	HODMe	MECP	1.85	15.19	15.26
44			2.15	15.19	15.26
45	HODMe	1i1	2.2	9.03	29.49
46			2.5	9.03	29.49

## Sheet: HODNO2
				singlet	singlet	singlet
				Full model (Singlet)	Substrate only (Singlet)	Substrate_Asp_His (Singlet)
1	HODNO2	3R	1	33.16	30.62	31.84		1.32
2			1.3	33.16	30.62	31.84		1.32
3	HODNO2	3I1	1.8	29.2	21.41	25.03		4.17
4			2.1	29.2	21.41	25.03		4.17
5	HODNO2	1i1	2.5	7.17	9.16	10.56		-3.39
6			2.8	7.17	9.16	10.56		-3.39
7	HODNO2	1TS3	3	19.02	25.52	27.38
8			3.3	19.02	25.52	27.38
				Full model (Triplet)	Substrate only (Triplet)	Substrate_Asp_His (Triplet)
75	HODNO2	3R	1	0	0	0		0
76			1.3	0	0	0		0
77	HODNO2	3I1	1.8	19.01	24.83	24.04		-5.03
78			2.1	19.01	24.83	24.04		-5.03
79	HODNO2	1i1	2.5	57.85	68.97	61.08		-3.23
80			2.8	57.85	68.97	61.08		-3.23
				newly optimized substrate_Asp_His (Singlet)	newly optimized substrate_Asp_His (Triplet)
41	HODNO2	3R	1	34.01	0
42			1.3	34.01	0
43	HODNO2	MECP	1.85	24.17	24.17
44			2.15	24.17	24.17
45	HODNO2	1I1 charge transfer	2.2	23.61	18.93
46			2.5	23.61	18.93

## Sheet: HODnBu
				singlet	singlet	singlet
				Full model (Singlet)	Substrate only (Singlet)	Substrate_Asp_His (Singlet)
1	HODnBu	3R	1	24.94	25.27	26.84		-1.9
2			1.3	24.94	25.27	26.84		-1.9
3	HODnBu	3I1	1.8	17.01	10.02	16.51		0.5
4			2.1	17.01	10.02	16.51		0.5
5	HODnBu	1i1	2.2	4.81	-4.37	1.52		3.29
6			2.5	4.81	-4.37	1.52		3.29
7	HODnBu	1TS3	3	25.54	7.11	17.22		8.32
8			3.3	25.54	7.11	17.22		8.32
				newly optimized substrate_Asp_His (Singlet)	newly optimized substrate_Asp_His (Triplet)
41	HODnBu	3R	1	24.96	0
42			1.3	24.96	0
43	HODnBu	MECP	1.85	16.82	16.77
44			2.15	16.82	16.77
45	HODnBu	1i1	2.2	11.06	30.53
46			2.5	11.06	30.53
47	HODMe	3R	1	22.84	0
48			1.3	22.84	0
				Full model (Triplet)	Substrate only (Triplet)	Substrate_Asp_His (Triplet)
75	HODnBu	3R	1	0	0	0		0
76			1.3	0	0	0		0
77	HODnBu	3I1	1.8	19.24	15.7	18.69		0.55
78			2.1	19.24	15.7	18.69		0.55
79	HODnBu	1i1	2.2	51.65	44.88	50.16		1.49
80			2.5	51.65	44.88	50.16		1.49

## Sheet: From Scrutton et at. SI
	HODMe
											chlorobenzene		water
			Gibbs Correction	SCF BS2	including PCM		gas phase Delta G	Solution Delta G	Solution Delta electronic energy		My HODMe		My HODMe
		3R	0.819876	-3522.72	-3522.83		1.37942e-11	1.37942e-11	0		0		0
		3I1	0.824748	-3522.69	-3522.81		16.9647	17.468	14.4108		12.78		12.59
		1i1	0.825273	-3522.7	-3522.82		10.4411	9.3386	5.95193		2.21		0.58
		1TS2	0.827258	-3522.7	-3522.82		11.9384	11.2193	6.58697
		1I2	0.827851	-3522.71	-3522.82		10.2447	10.5233	5.51895
		1TS3	0.825087	-3522.7	-3522.81		14.9812	14.6662	11.3962		8.8		7.85
		P	0.81832	-3522.88	-3522.99		-105.243	-100.665	-99.6887
										correl	0.969206	0.932061	0.992538
										R-squared	0.93936	0.868738
	HODNO2
			Gibbs Correction	SCF BS2	SCF BS2+Solv.		gas phase Delta G	Solution Delta G	Solution Delta electronic energy		My HODNO2		My HODNO2
		3R	0.789313	-3687.94	-3688.06		1.38151e-10	1.38151e-10	0		0		0
		3I1	0.794232	-3687.91	-3688.02		27.0382	26.8907	23.804		20.1		19.01
		1i1	0.795861	-3687.92	-3688.04		18.4388	15.9689	11.8599		8.71		7.17
		1TS2	0.797402	-3687.92	-3688.03		22.0777	22.2942	17.2182
		1I2	0.79709	-3687.92	-3688.04		18.088	19.5375	14.6574
		1TS3	0.794341	-3687.91	-3688.02		24.7797	25.1983	22.0432		19.37		19.02
		P	0.786828	-3688.08	-3688.19		-88.5661	-87.0381	-85.4788
										correl	0.99641	0.987922	0.997491
										R-squared	0.992832	0.97599
	HODF
			Gibbs Correction	SCF BS2	SCF BS2+Solv.		gas phase Delta G	Solution Delta G	Solution Delta electronic energy		My HODF		My HODF
		3R	0.783388	-3582.65	-3582.76		-1.05616e-10	-1.05616e-10	0		0		0
		3I1	0.788898	-3582.64	-3582.75		11.1258	11.1044	7.64684		5.89		5.54
		1i1	0.790715	-3582.65	-3582.77		1.71749	1.14521	-3.45256		-8.87		-10.06
		1TS2	0.791521	-3582.64	-3582.76		7.21323	8.64709	3.54355
		1I2	0.790144	-3582.65	-3582.76		3.83848	5.59864	1.35919
		1TS3	0.787238	-3582.62	-3582.74		17.5904	17.9769	15.561		13.3		12.66
		P	0.779896	-3582.8	-3582.91		-96.4872	-92.869	-90.6777
										correl	0.973093	0.960925	0.998837
	HODnBu									R-squared	0.946911	0.923376
			Gibbs Correction	SCF BS2	SCF BS2+Solv.		gas phase Delta G	Solution Delta G	Solution Delta electronic energy		My HODnBu		My HODnBu
		3R	0.931085	-3679.99	-3680.09		1.04432e-10	1.04432e-10	0		0		0
		3I1	0.937243	-3679.95	-3680.06		25.1857	26.8304	22.9662		19.13		19.24
		1i1	0.940466	-3679.97	-3680.08		16.6704	16.6353	10.7486		5.45		4.81
		1TS2	0.941718	-3679.97	-3680.08		15.9808	16.9641	10.2918
		1I2	0.941011	-3679.97	-3680.08		15.5265	15.9714	9.74272
		1TS3	0.934421	-3679.94	-3680.04		32.0325	33.637	31.5437		26.71		25.54
		P	0.928944	-3680.15	-3680.26		-103.151	-103.208	-101.865
										correl	0.990073	0.98626	0.999062
										R-squared	0.980244	0.972708
