# Supplementary material for: Refining the reaction mechanism of O2 towards its co-substrate in cofactor-free dioxygenases
Source: PeerJ. 2016 Dec 20;4:e2805. doi: 10.7717/peerj.2805 (PMC5178339; doi:10.7717/peerj.2805)
Supplement: Supplemental Information 3 [file peerj-04-2805-s003.xlsx]

## Sheet: Data
	water								gas
6-31(+)G**			Reactant geometry			product geometry		6-31(+)G**			Reactant geometry			product geometry
	products	superoxide	-94409.5			-94420.6			products	superoxide	-150.329			-150.347
		HODMe radical	-370923			-370927				HODMe radical	-591.074			-591.08
		HODF radical	-408511			-408515				HODF radical	-650.975			-650.981
		HODnBu radical	-469607			-469610				HODnBu radical	-748.336			-748.342
		HODNO2 radical	-474569			-474572				HODNO2 radical	-756.242			-756.249
				Electron affinity (eV)								Electron affinity (eV)
	reactants	o2	-94330.8	3.89719		-94320.8			reactants	o2	-150.325	0.584371		-150.31
		HODMe	-371015	-3.8304		-371012				HODMe	-591.138	-1.58563		-591.134
		HODF	-408608	-4.05026		-408604				HODF	-651.046	-1.77102		-651.041
		HODnBu	-469699	-3.85035		-469695				HODnBu	-748.402	-1.62351		-748.397
		HODNO2	-474687	-4.98174		-474683				HODNO2	-756.364	-3.11255		-756.36
		rxn energy	energy of produts at reactant geometries	Energy of reactants at product geometries						rxn energy	energy of produts at reactant geometries	Energy of reactants at product geometries
6-31(+)G**	HODMe	-1.54	13.39	13.49					HODMe	23.0892	38.3487	12.5718
6-31(+)G**	HODF	3.53	18.58	14.25					HODF	27.3643	42.7716	13.0737
6-31(+)G**	HODnBu	-1.08	13.44	13.43					HODnBu	23.9627	39.0383	12.5666
6-31(+)G**	HODNO2	25.01	39.51	13.61					HODNO2	58.3003	74.4418	12.5652
6-311(+)G**								6-311(+)G**
			Reactant geometry			product geometry					Reactant geometry			product geometry
	products	superoxide	-94438.7			-94448.8			products	superoxide	-150.375			-150.392
		HODMe radical	-371012			-371016				HODMe radical	-591.215			-591.221
		HODF radical	-408615			-408620				HODF radical	-651.141			-651.148
		HODnBu radical	-469716			-469720				HODnBu radical	-748.511			-748.517
		HODNO2 radical	-474687			-474691				HODNO2 radical	-756.43			-756.439
		HODNO	-427481			-427489
		HODCN	-404222			-404226
		HODCOCH3	-442145			-442150
		HODNH2	-381089			-381095
		HODCOO-	-464420			-464421
		protonated HODMe	-371281			-371285
				Electron affinity (eV)								Electron affinity (eV)
	reactants	o2	-94359	-3.89458		-94347.8			reactants	o2	-150.37	-0.579455		-150.353
		HODMe	-371108	4.00126		-371105				HODMe	-591.287	-1.77234		-591.283
		HODF	-408717	4.23153		-408713				HODF	-651.22	-1.97037		-651.216
		HODnBu	-469813	4.02555		-469810				HODnBu	-748.584	-1.81281		-748.581
		HODNO2	-474809	5.08841		-474806				HODNO2	-756.557	-3.22548		-756.555
		HODNO	-427599	4.76318		-427591
		HODCN	-404334	4.67602		-404331
		HODCOCH3	-442256	4.60837		-442253
		HODNH2	-381180	3.68557		-381176
		HODCOO-	-464515	4.08539		-464512
		protonated HODMe	-371414	5.57106		-371410
		rxn energy	energy of produts at reactant geometries	Energy of reactants at product geometries						rxn energy	energy of produts at reactant geometries	Energy of reactants at product geometries
	HODMe	2.46	16.8	14.12					HODMe	27.5081	42.1651	13.1784
	HODF	7.77	22.26	14.83					HODF	32.0748	46.938	13.5918
	HODnBu	3.02	16.98	14.03					HODnBu	28.4414	42.9524	13.0904
	HODNO2	27.53	41.9	13.89					HODNO2	61.0181	77.0042	12.7695
	HODNO	20.03	38.36	19.51
	HODCN	18.02	31.7	13.82
	HODCOCH3	16.46	31.23	14.18
	HODNH2	-4.82	11.85	15.71
	HODCOO-	4.4	15.57	14.89
	protonated HODMe	38.66	53.1	15.2
	chlorobenzene
6-31(+)G**			Reactant geometry			product geometry
	products	superoxide	-94396.6			-94407.8
		HODMe radical	-370918			-370922
		HODF radical	-408506			-408510
		HODnBu radical	-469602			-469605
		HODNO2 radical	-474563			-474567
				Electron affinity (eV)
	reactants	o2	-94330.8	3.34168		-94320.8
		HODMe	-371000	-3.40326		-370997
		HODF	-408594	-3.62486		-408590
		HODnBu	-469684	-3.41801		-469681
		HODNO2	-474675	-4.66474		-474671
		rxn energy	energy of produts at reactant geometries	Energy of reactants at product geometries
	HODMe	1.42	16.44	13.2
	HODF	6.53	21.68	13.95
	HODnBu	1.76	16.41	13.19
	HODNO2	30.51	45.49	13.35
6-311(+)G**
			Reactant geometry			product geometry
	products	superoxide	-94425.7			-94435.9
		HODMe radical	-371006			-371011
		HODF radical	-408610			-408615
		HODnBu radical	-469711			-469715
		HODNO2 radical	-474682			-474686
		HODNO	-427477			-427485
		HODCN	-404217			-404221
		HODCOCH3	-442141			-442146
		HODNH2	-381083			-381089
		HODCOO-	-464403			-464407
		protonated HODMe	-371271			-371275
				Electron affinity (eV)
	reactants	o2	-94358.9	-3.33778		-94347.8
		HODMe	-371093	3.57759		-371091
		HODF	-408703	3.81046		-408699
		HODnBu	-469798	3.59623		-469795
		HODNO2	-474796	4.77272		-474794
		HODNO	-427586	4.36379		-427578
		HODCN	-404321	4.3304		-404318
		HODCOCH3	-442245	4.26795		-442242
		HODNH2	-381164	3.2736		-381159
		HODCOO-	-464479	3.11749		-464476
		protonated HODMe	-371410	5.85554		-371406
		rxn energy	energy of produts at reactant geometries	Energy of reactants at product geometries
	HODMe	5.53	19.92	13.83
	HODF	10.9	25.47	14.51
	HODnBu	5.96	20.02	13.77
	HODNO2	33.09	47.89	13.61
	HODNO	23.66	42.08	19.49
	HODCN	22.89	36.77	13.51
	HODCOCH3	21.45	36.41	14.03
	HODNH2	-1.48	14.79	16.2
	HODCOO-	-5.08	9.16	14.44
	protonated HODMe	58.06	72.58	15.07

## Sheet: HODF parabolas
						BS1 chlorobenzene	BS2 chlorobenzene	BS1 water	BS2 water
	6-31(+)G**	chlorobenzene	HODF	reactant parabola	0	0	0	0	0
	6-31(+)G**	chlorobenzene	HODF	reactant parabola	-1	13.95	14.51	14.25	14.83
	6-31(+)G**	chlorobenzene	HODF	reactant parabola	1	13.95	14.51	14.25	14.83
	6-31(+)G**	chlorobenzene	HODF	product parabola	1	6.53	10.9	3.53	7.77
	6-31(+)G**	chlorobenzene	HODF	product parabola	0	21.68	25.47	18.58	22.26
	6-31(+)G**	chlorobenzene	HODF	product parabola	2	21.68	25.47	18.58	22.26
					a	13.95	14.51	14.25	14.83
					b	0	0	0	0
					c	0	0	0	0
					a	15.15	14.57	15.05	14.49
					b	-30.3	-29.14	-30.1	-28.98
					c	21.68	25.47	18.58	22.26
					A	1.2	0.06	0.8	-0.34
					B	-30.3	-29.14	-30.1	-28.98
					C	21.68	25.47	18.58	22.26
						24.513	484.791	36.9973	-85.9966
						0.737025	0.875635	0.627749	0.761316
					E act=	7.57771	11.1253	5.61549	8.5955

## Sheet: HODMe parabolas (protonated)
							BS2 chlorobenzene		BS2 water
	6-31(+)G**	chlorobenzene	HODMe	reactant parabola	0		0		0
	6-31(+)G**	chlorobenzene	HODMe	reactant parabola	-1		15.07		15.2
	6-31(+)G**	chlorobenzene	HODMe	reactant parabola	1		15.07		15.2
	6-31(+)G**	chlorobenzene	HODMe	product parabola	1		58.06		38.66
	6-31(+)G**	chlorobenzene	HODMe	product parabola	0		72.58		53.1
	6-31(+)G**	chlorobenzene	HODMe	product parabola	2		72.58		53.1
					a		15.07		15.2
					b		0		0
					c		0		0
					a		14.52		14.44
					b		-29.04		-28.88
					c		72.58		53.1
					A		-0.55		-0.76
					B		-29.04		-28.88
					C		72.58		53.1
							-55.191		-39.7574
							2.39103		1.75737
					E act=		86.1558		46.9429

## Sheet: HODMe parabolas
						BS1 chlorobenzene	BS2 chlorobenzene	BS1 water	BS2 water
	6-31(+)G**	chlorobenzene	HODMe	reactant parabola	0	0	0	0	0
	6-31(+)G**	chlorobenzene	HODMe	reactant parabola	-1	13.2	13.83	13.49	14.12
	6-31(+)G**	chlorobenzene	HODMe	reactant parabola	1	13.2	13.83	13.49	14.12
	6-31(+)G**	chlorobenzene	HODMe	product parabola	1	1.42	5.53	-1.54	2.46
	6-31(+)G**	chlorobenzene	HODMe	product parabola	0	16.44	19.92	13.39	16.8
	6-31(+)G**	chlorobenzene	HODMe	product parabola	2	16.44	19.92	13.39	16.8
					a	13.2	13.83	13.49	14.12
					b	0	0	0	0
					c	0	0	0	0
					a	15.02	14.39	14.93	14.34
					b	-30.04	-28.78	-29.86	-28.68
					c	16.44	19.92	13.39	16.8
					A	1.82	0.56	1.44	0.22
					B	-30.04	-28.78	-29.86	-28.68
					C	16.44	19.92	13.39	16.8
						15.9388	50.6911	20.2775	129.775
						0.566729	0.701729	0.458567	0.58843
					E act=	4.23961	6.81022	2.83673	4.88905

## Sheet: HODnBu parabolas
						BS1 chlorobenzene	BS2 chlorobenzene	BS1 water	BS2 water
	6-31(+)G**	chlorobenzene	HODnBu	reactant parabola	0	0	0	0	0
	6-31(+)G**	chlorobenzene	HODnBu	reactant parabola	-1	13.19	13.77	13.43	14.03
	6-31(+)G**	chlorobenzene	HODnBu	reactant parabola	1	13.19	13.77	13.43	14.03
	6-31(+)G**	chlorobenzene	HODnBu	product parabola	1	1.76	5.96	-1.08	3.02
	6-31(+)G**	chlorobenzene	HODnBu	product parabola	0	16.41	20.02	13.44	16.98
	6-31(+)G**	chlorobenzene	HODnBu	product parabola	2	16.41	20.02	13.44	16.98
					a	13.19	13.77	13.43	14.03
					b	0	0	0	0
					c	0	0	0	0
					a	14.65	14.06	14.52	13.96
					b	-29.3	-28.12	-29.04	-27.92
					c	16.41	20.02	13.44	16.98
					A	1.46	0.29	1.09	-0.07
					B	-29.3	-28.12	-29.04	-27.92
					C	16.41	20.02	13.44	16.98
						19.4919	96.2483	26.1711	-399.464
						0.576637	0.717254	0.471142	0.607242
					E act=	4.38581	7.08403	2.98112	5.17346

## Sheet: HODNO2 parabolas
						BS1 chlorobenzene	BS2 chlorobenzene	BS1 water	BS2 water
	6-31(+)G**	chlorobenzene	HODNO2	reactant parabola	0	0	0	0	0
	6-31(+)G**	chlorobenzene	HODNO2	reactant parabola	-1	13.35	13.61	13.61	13.89
	6-31(+)G**	chlorobenzene	HODNO2	reactant parabola	1	13.35	13.61	13.61	13.89
	6-31(+)G**	chlorobenzene	HODNO2	product parabola	1	30.51	33.09	25.01	27.53
	6-31(+)G**	chlorobenzene	HODNO2	product parabola	0	45.49	47.89	39.51	41.9
	6-31(+)G**	chlorobenzene	HODNO2	product parabola	2	45.49	47.89	39.51	41.9
					a	13.35	13.61	13.61	13.89
					b	0	0	0	0
					c	0	0	0	0
					a	14.98	14.8	14.5	14.37
					b	-29.96	-29.6	-29	-28.74
					c	45.49	47.89	39.51	41.9
					A	1.63	1.19	0.89	0.48
					B	-29.96	-29.6	-29	-28.74
					C	45.49	47.89	39.51	41.9
						16.7103	23.1344	31.1596	58.3798
						1.67011	1.73956	1.42471	1.49524
					E act=	37.2367	41.1849	27.6255	31.0544

## Sheet: HODNO
							BS2 chlorobenzene		BS2 water
	6-31(+)G**	chlorobenzene	HODNO	reactant parabola	0		0		0
	6-31(+)G**	chlorobenzene	HODNO	reactant parabola	-1		19.49		19.51
	6-31(+)G**	chlorobenzene	HODNO	reactant parabola	1		19.49		19.51
	6-31(+)G**	chlorobenzene	HODNO	product parabola	1		23.66		20.03
	6-31(+)G**	chlorobenzene	HODNO	product parabola	0		42.08		38.36
	6-31(+)G**	chlorobenzene	HODNO	product parabola	2		42.08		38.36
					a		19.49		19.51
					b		0		0
					c		0		0
					a		18.42		18.33
					b		-36.84		-36.66
					c		42.08		38.36
					A		-1.07		-1.18
					B		-36.84		-36.66
					C		42.08		38.36
							-35.5366		-32.0811
							1.10667		1.01332
					E act=		23.8696		20.0333

## Sheet: HODCN
							BS2 chlorobenzene		BS2 water
	6-31(+)G**	chlorobenzene	HODCN	reactant parabola	0		0		0
	6-31(+)G**	chlorobenzene	HODCN	reactant parabola	-1		13.51		13.82
	6-31(+)G**	chlorobenzene	HODCN	reactant parabola	1		13.51		13.82
	6-31(+)G**	chlorobenzene	HODCN	product parabola	1		22.89		18.02
	6-31(+)G**	chlorobenzene	HODCN	product parabola	0		36.77		31.7
	6-31(+)G**	chlorobenzene	HODCN	product parabola	2		36.77		31.7
					a		13.51		13.82
					b		0		0
					c		0		0
					a		13.88		13.68
					b		-27.76		-27.36
					c		36.77		31.7
					A		0.37		-0.14
					B		-27.76		-27.36
					C		36.77		31.7
							73.6782		-196.58
							1.34882		1.15184
					E act=		24.5788		18.3354

## Sheet: HODNH2
							BS2 chlorobenzene		BS2 water
	6-31(+)G**	chlorobenzene	HODNH2	reactant parabola	0		0		0
	6-31(+)G**	chlorobenzene	HODNH2	reactant parabola	-1		16.2		15.71
	6-31(+)G**	chlorobenzene	HODNH2	reactant parabola	1		16.2		15.71
	6-31(+)G**	chlorobenzene	HODNH2	product parabola	1		-1.48		-4.82
	6-31(+)G**	chlorobenzene	HODNH2	product parabola	0		14.79		11.85
	6-31(+)G**	chlorobenzene	HODNH2	product parabola	2		14.79		11.85
					a		16.2		15.71
					b		0		0
					c		0		0
					a		16.27		16.67
					b		-32.54		-33.34
					c		14.79		11.85
					A		0.07		0.96
					B		-32.54		-33.34
					C		14.79		11.85
							464.402		34.37
							0.454963		0.359143
					E act=		3.35326		2.02633

## Sheet: HODCOCH3
														16.46	31.23	14.18
														21.45	36.41	14.03
							BS2 chlorobenzene		BS2 water
	6-31(+)G**	chlorobenzene	HODCOCH3	reactant parabola	0		0		0
	6-31(+)G**	chlorobenzene	HODCOCH3	reactant parabola	-1		14.03		14.18
	6-31(+)G**	chlorobenzene	HODCOCH3	reactant parabola	1		14.03		14.18
	6-31(+)G**	chlorobenzene	HODCOCH3	product parabola	1		21.45		16.46
	6-31(+)G**	chlorobenzene	HODCOCH3	product parabola	0		36.41		31.23
	6-31(+)G**	chlorobenzene	HODCOCH3	product parabola	2		36.41		31.23
					a		14.03		14.18
					b		0		0
					c		0		0
					a		14.96		14.77
					b		-29.92		-29.54
					c		36.41		31.23
					A		0.93		0.59
					B		-29.92		-29.54
					C		36.41		31.23
							30.9053		48.9873
							1.26679		1.08053
					E act=		22.5148		16.5558

[truncated: 1 more sheets: HODCOO-]
