# Supplementary material for: Refining the reaction mechanism of O2 towards its co-substrate in cofactor-free dioxygenases
Source: PeerJ. 2016 Dec 20;4:e2805. doi: 10.7717/peerj.2805 (PMC5178339; doi:10.7717/peerj.2805)
Supplement: Supplemental Information 10 [file peerj-04-2805-s010.xls]

## Sheet: spin_tble_HODNO2_3I1
		MECP (triplet state)	3I1
1	C	0	1e-06
2	O	5e-06	-4e-06
3	O	1e-06	0
4	C	2.2e-05	-0.000106
5	N	3.1e-05	0.000389
6	C	0.000165	3.3e-05
7	C	0.000127	-7e-06
8	N	-0.000107	-0.000227
9	N	-0.005434	0.008142
10	C	0.04786	0.014475
11	C	0.062392	0.196843
12	C	0.052717	0.141307
13	C	0.024719	0.053621
14	C	-0.014481	-0.019829
15	C	0.023621	0.056435
16	C	-0.01404	-0.020276
17	C	0.02165	0.040901
18	C	-0.01347	-0.027884
19	O	0.103532	0.301966
20	O	0.065891	0.162398
21	O	0.000183	0.000503
22	O	0.736482	0.661567
23	O	0.726925	0.346822
24	H	6.2e-05	-4.8e-05
25	H	3e-06	-1e-05
26	H	-0.000145	-0.000511
27	H	-2e-06	-1e-06
28	H	-0.000314	-0.000701
29	H	0.000211	0.000253
30	H	-0.000363	-0.000855
31	H	0.000208	0.000247
32	H	-0.00019	-0.00024
33	H	2e-06	9.5e-05
34	H	-7.9e-05	-0.000186
35	N	0.065299	0.038634
36	O	0.050667	0.036107
37	O	0.065853	0.010152
38	H	0	0
39	H	-2e-06	-3e-06
