# Supplementary material for: Refining the reaction mechanism of O2 towards its co-substrate in cofactor-free dioxygenases
Source: PeerJ. 2016 Dec 20;4:e2805. doi: 10.7717/peerj.2805 (PMC5178339; doi:10.7717/peerj.2805)
Supplement: Supplemental Information 11 [file peerj-04-2805-s011.xls]

## Sheet: spin_tble_HODMe_first
		MECP (triplet state)
1	C	0
2	O	1.1e-05
3	O	2e-06
4	C	1.2e-05
5	N	4.3e-05
6	C	4e-06
7	C	0.000157
8	N	0.000437
9	N	-0.006008
10	C	0.072095
11	C	0.115436
12	C	0.093804
13	C	0.037984
14	C	-0.021854
15	C	0.043335
16	C	-0.025673
17	C	0.040836
18	C	-0.017243
19	C	-0.001071
20	O	0.111255
21	O	0.116492
22	O	0.00043
23	O	0.694279
24	O	0.739436
25	H	1.9e-05
26	H	1e-05
27	H	6.6e-05
28	H	-1e-06
29	H	-0.000472
30	H	0.000306
31	H	-0.000667
32	H	0.000353
33	H	0.001257
34	H	0.000885
35	H	0.004499
36	H	-0.0004
37	H	3.6e-05
38	H	-8.5e-05
39	H	0
40	H	-5e-06
