# Supplementary material for: Refining the reaction mechanism of O2 towards its co-substrate in cofactor-free dioxygenases
Source: PeerJ. 2016 Dec 20;4:e2805. doi: 10.7717/peerj.2805 (PMC5178339; doi:10.7717/peerj.2805)
Supplement: Supplemental Information 12 [file peerj-04-2805-s012.xls]

## Sheet: spin_tble_HODpentyl_first
		MECP (triplet state)
1	C	0
2	O	3e-06
3	O	1e-06
4	C	-1.1e-05
5	N	2.2e-05
6	C	4.1e-05
7	C	0.000122
8	N	-0.000102
9	N	0.002084
10	C	0.085648
11	C	0.097423
12	C	0.08372
13	C	0.033277
14	C	-0.017976
15	C	0.039535
16	C	-0.023136
17	C	0.037074
18	C	-0.011827
19	C	-0.001858
20	O	0.092337
21	O	0.100393
22	O	0.000958
23	O	0.76529
24	O	0.711463
25	H	1.1e-05
26	H	2e-06
27	H	-0.000219
28	H	5e-06
29	H	-0.000461
30	H	0.000247
31	H	-0.00061
32	H	0.00031
33	H	0.000709
34	H	0.005067
35	H	0.000367
36	H	9e-06
37	H	-9.4e-05
38	C	0.001593
39	H	-5.7e-05
40	H	-0.000112
41	C	-0.00139
42	H	0.000237
43	H	-0.000126
44	C	3.7e-05
45	H	2.9e-05
46	H	-9.4e-05
47	C	5.5e-05
48	H	1e-06
49	H	7e-06
50	H	3e-06
51	H	0
52	H	-5e-06
